# Supplementary material
Source: bioRxiv or medRxiv preprint supplement (https://www.medrxiv.org/highwire/filestream/79726/field_highwire_adjunct_files/0/2020.05.03.20084160-1.pdf)

**eTable 1.** Methods of reference to identify true positives and true negatives.

| <b>Test name</b>                | <b>Identification of positive subjects</b>                                                                                         | <b>Identification of negative subjects</b>                                                                                                    |
|---------------------------------|------------------------------------------------------------------------------------------------------------------------------------|-----------------------------------------------------------------------------------------------------------------------------------------------|
| Lou et al. [4]                  | SARS-CoV-2 through real-time RT-PCR (rRT-PCR) testing.                                                                             | SARS-CoV-2 through real-time RT-PCR (rRT-PCR) testing.                                                                                        |
| Lin et al [5]                   | Combinations of epidemiological risk factors, clinical features and positive detections of SARS-CoV-2 RNA in respiratory specimens | Combination of epidemiological risks, and persistently negative for SARS-CoV-2 RNA detections in at least three respiratory specimens' tests. |
| Liu et al. [6]                  | SARS-CoV-2 through real-time RT-PCR (rRT-PCR) testing at a median of 15 d.p.o. (range. 0–55 days).                                 | Serum samples from 100 healthy blood donors.                                                                                                  |
| Zhao et al. [7]                 | SARS-CoV-2 by use of real-time RT-PCR (rRT-PCR)                                                                                    | Samples collected from healthy individuals before the outbreak of SARS-CoV-2.                                                                 |
| Creative Diagnostics [8]        | SARS-CoV-2 by use of real-time RT-PCR (rRT-PCR) after the second week of the onset of the disease.                                 | Normal healthy patients with samples collected prior to the SARS-COV-2 outbreak.                                                              |
| Epitope Diagnostic [9]          | SARS-CoV-2 by use of real-time RT-PCR (rRT-PCR) after the second week of the onset of the disease.                                 | Normal healthy patients with samples collected prior to the COVID outbreak.                                                                   |
| Lassaunière et al. [10]         | SARS-CoV-2 by use of real-time RT-PCR (rRT-PCR)                                                                                    | Samples collected from healthy individuals before the outbreak of SARS-CoV-2.                                                                 |
| Ortho-Clinical Diagnostics [11] | SARS-CoV-2 by use of real-time RT-PCR (rRT-PCR)                                                                                    | 400 presumed SARS-CoV-2 negative samples from healthy blood donors were tested.                                                               |
| Adams et al. [12]               | SARS-CoV-2 through real-time RT-PCR (rRT-PCR)                                                                                      | Plasma samples collected from healthy individuals before the outbreak of SARS-CoV-2.                                                          |

**eFigure 1.** Forest plot of the sensitivity of serological test for the detection of anti-SARS-CoV-2 IgM.

### Antibody IgM

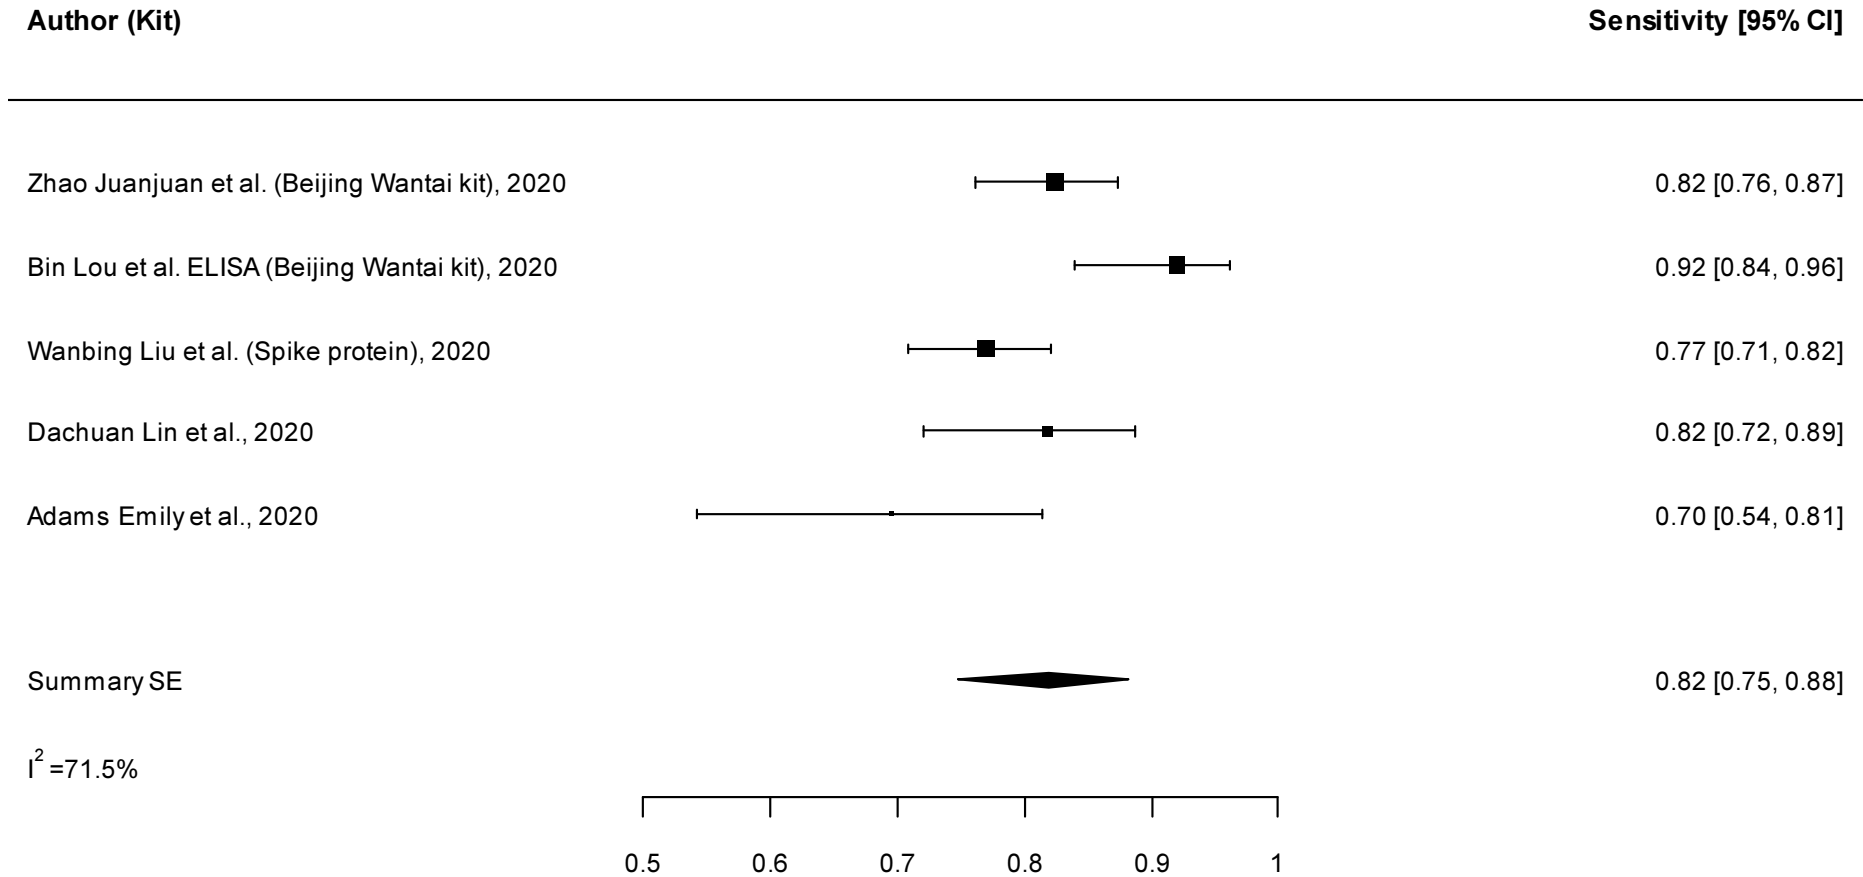

**eFigure 2.** Forest plot of the sensitivity of serological test for the detection of anti-SARS-CoV-2 IgG.

### Antibody IgG

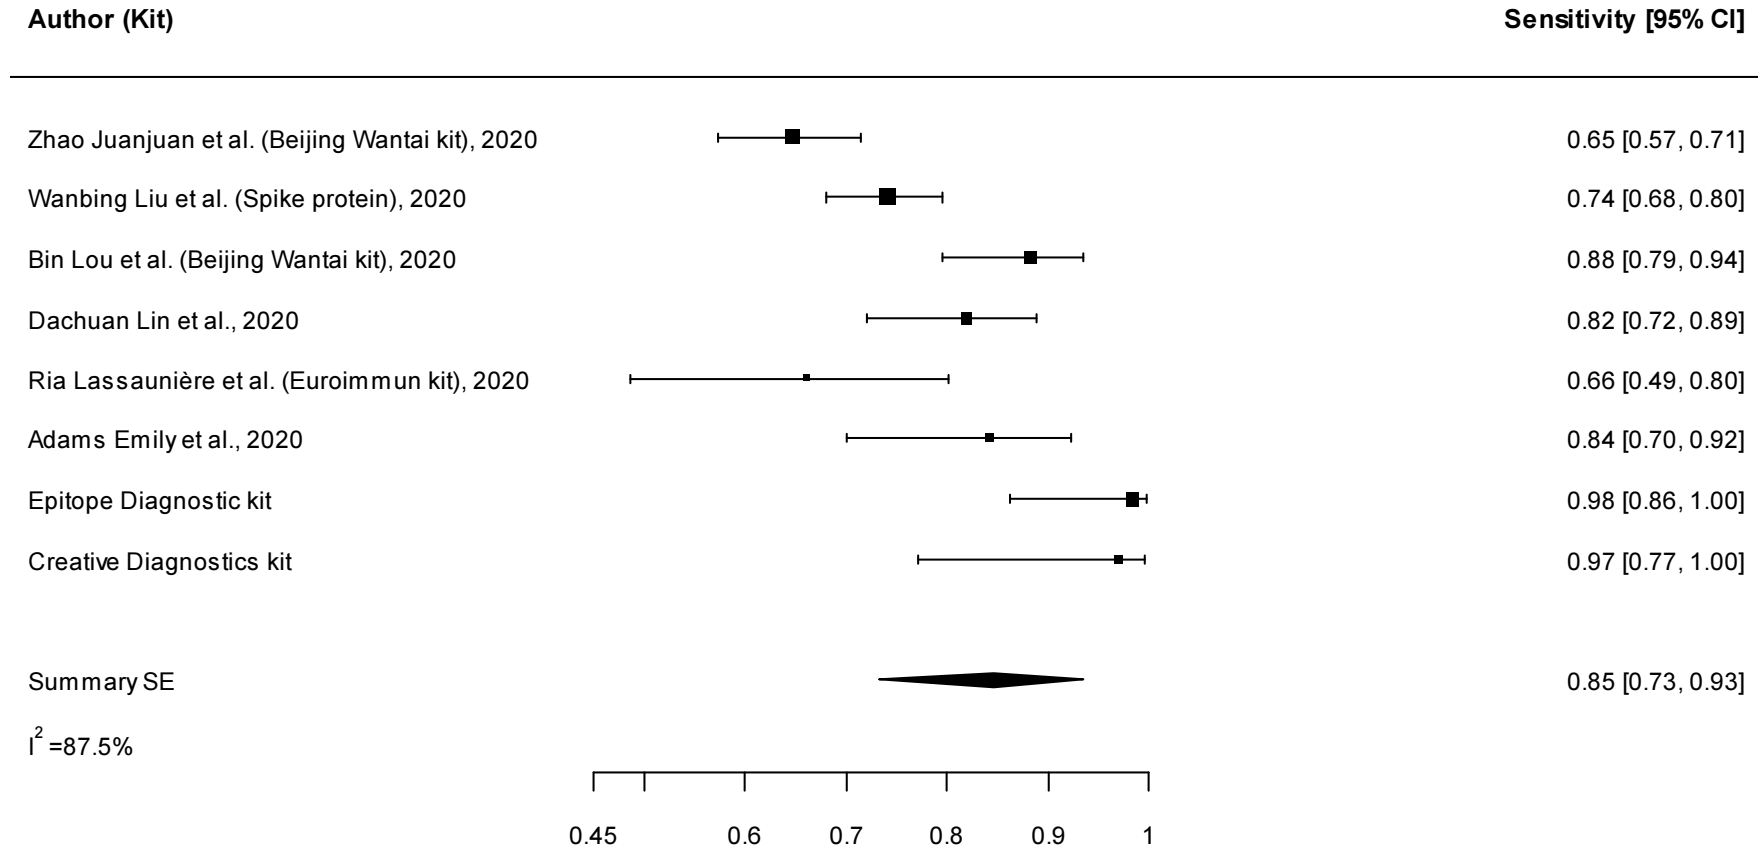

**eFigure 3.** Forest plot of the sensitivity of serological test for the detection of anti-SARS-CoV-2 total antibodies.

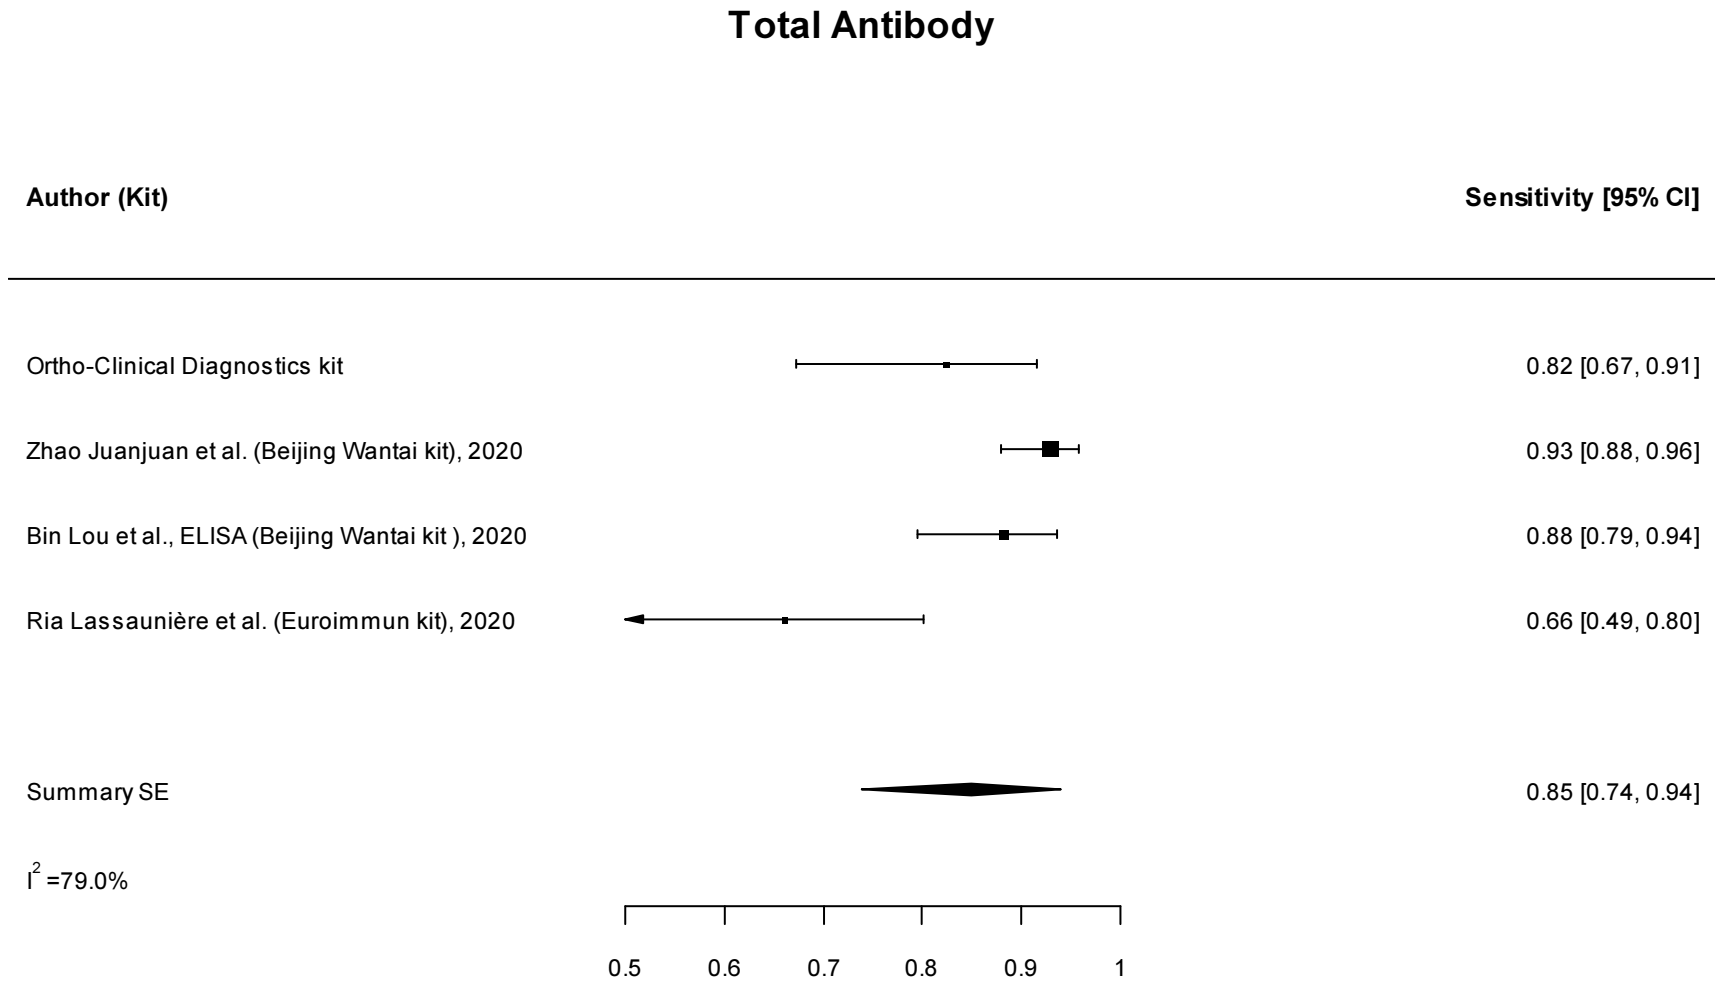

**eFigure 4.** Forest plot of the specificity of serological test for the detection of anti-SARS-CoV-2 IgM.

### Antibody IgM

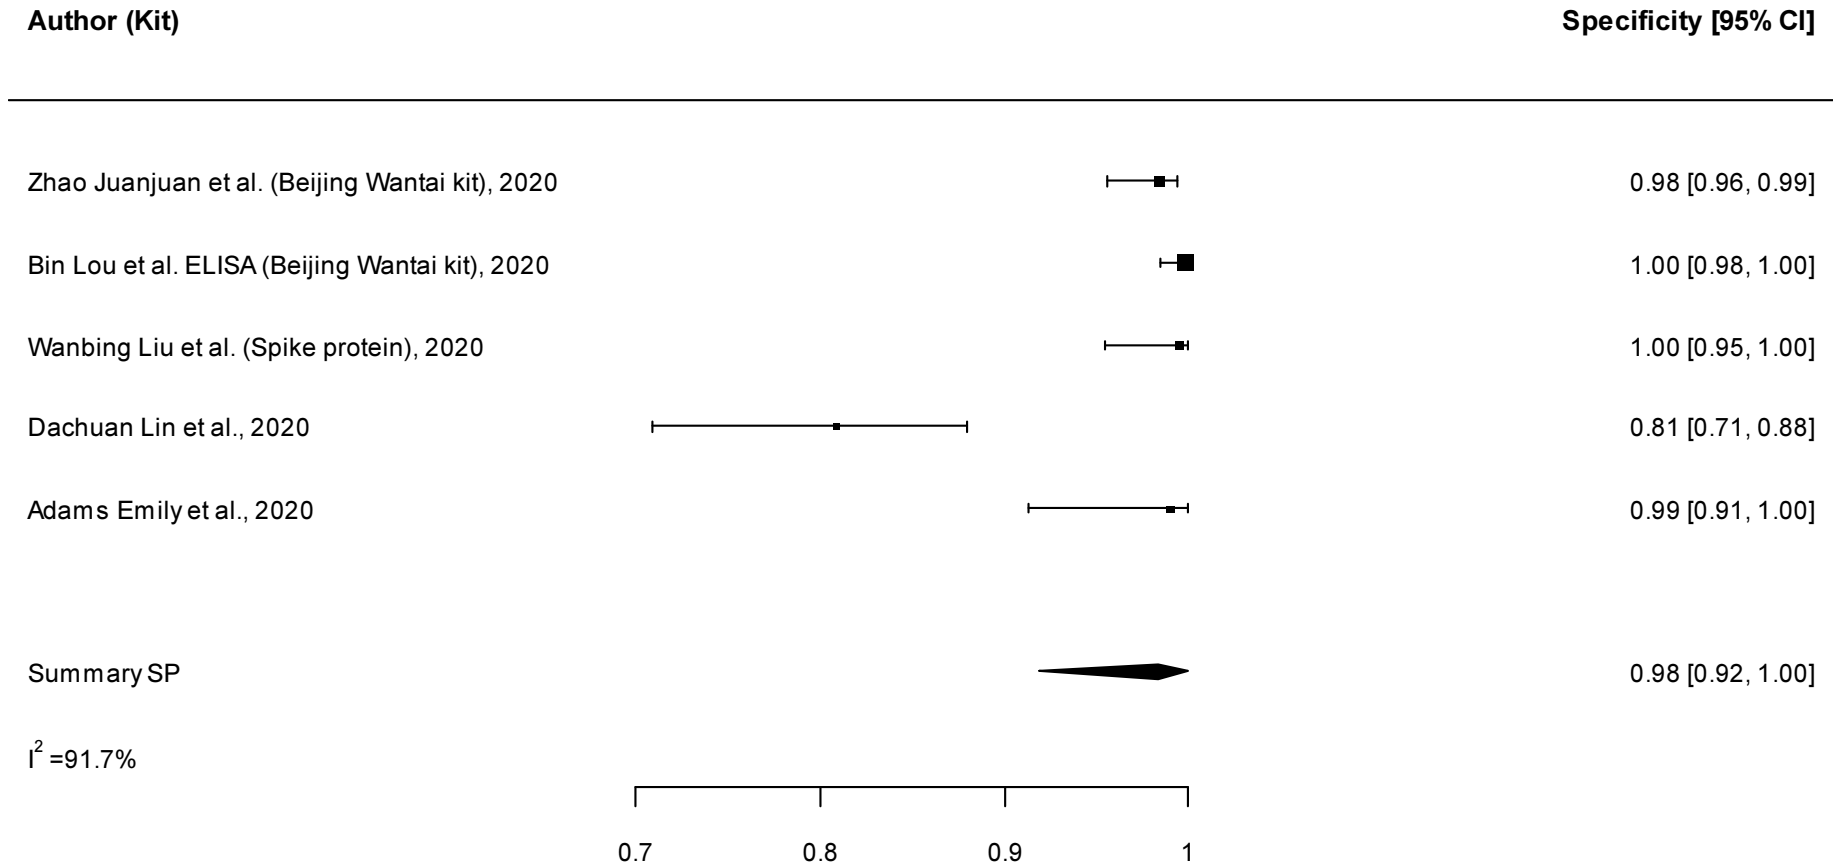

**eFigure 5.** Forest plot of the specificity of serological test for the detection of anti-SARS-CoV-2 IgG.

## Antibody IgG

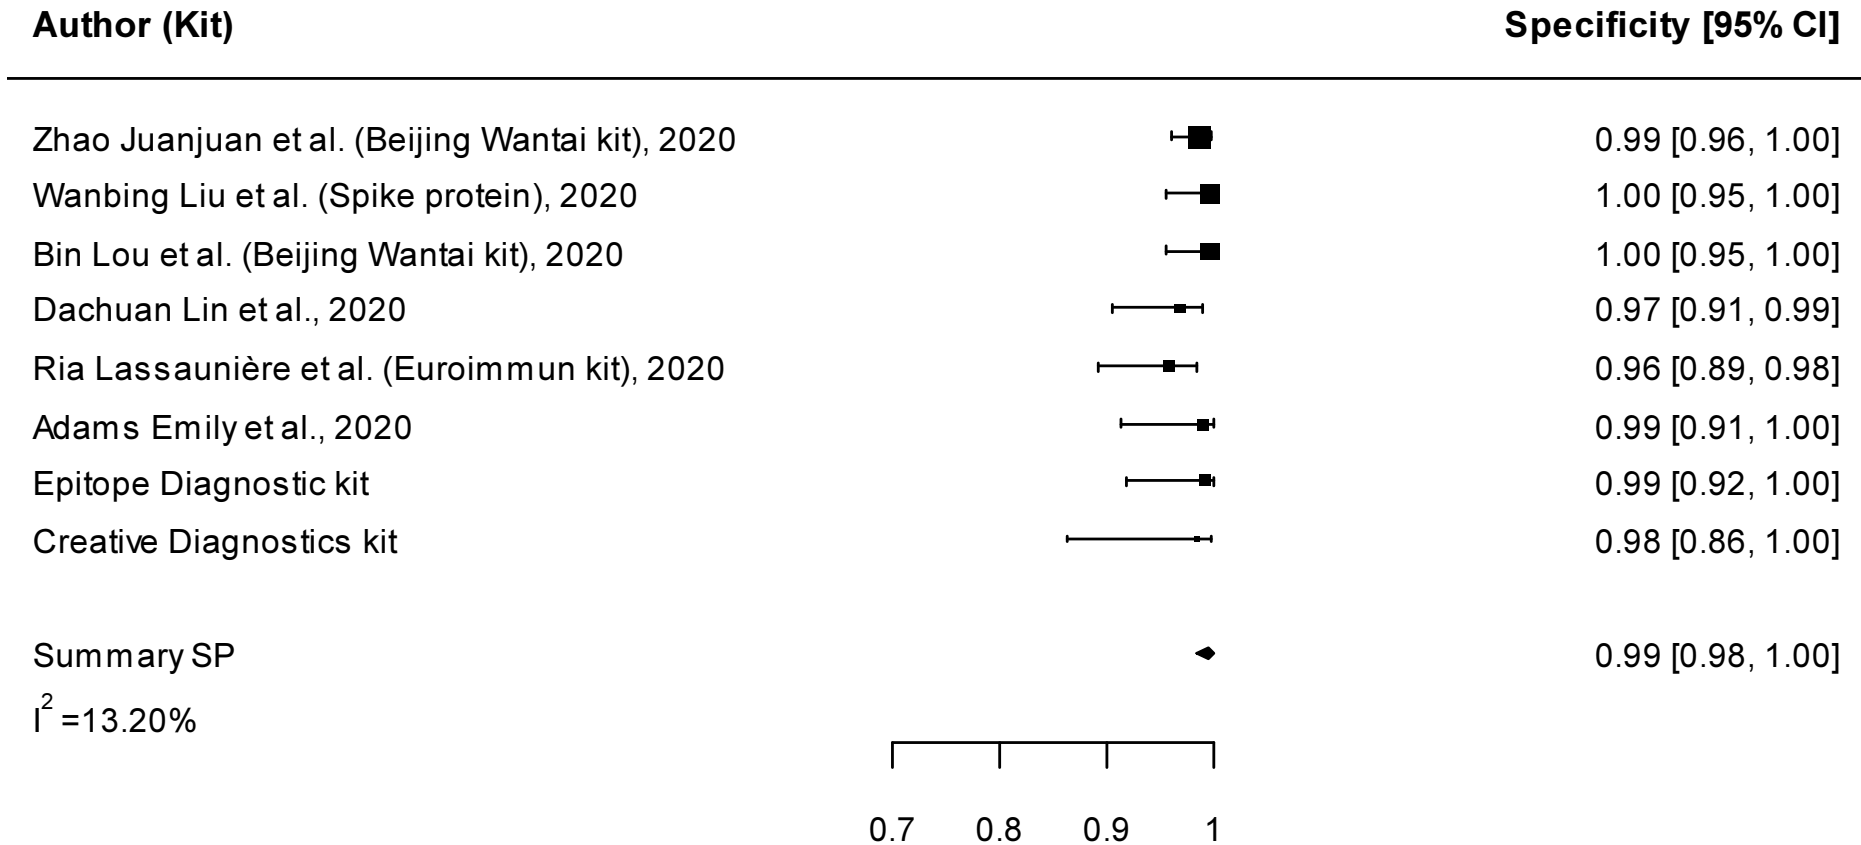

**eFigure 6.** Forest plot of the specificity of serological test for the detection of anti-SARS-CoV-2 total antibodies.

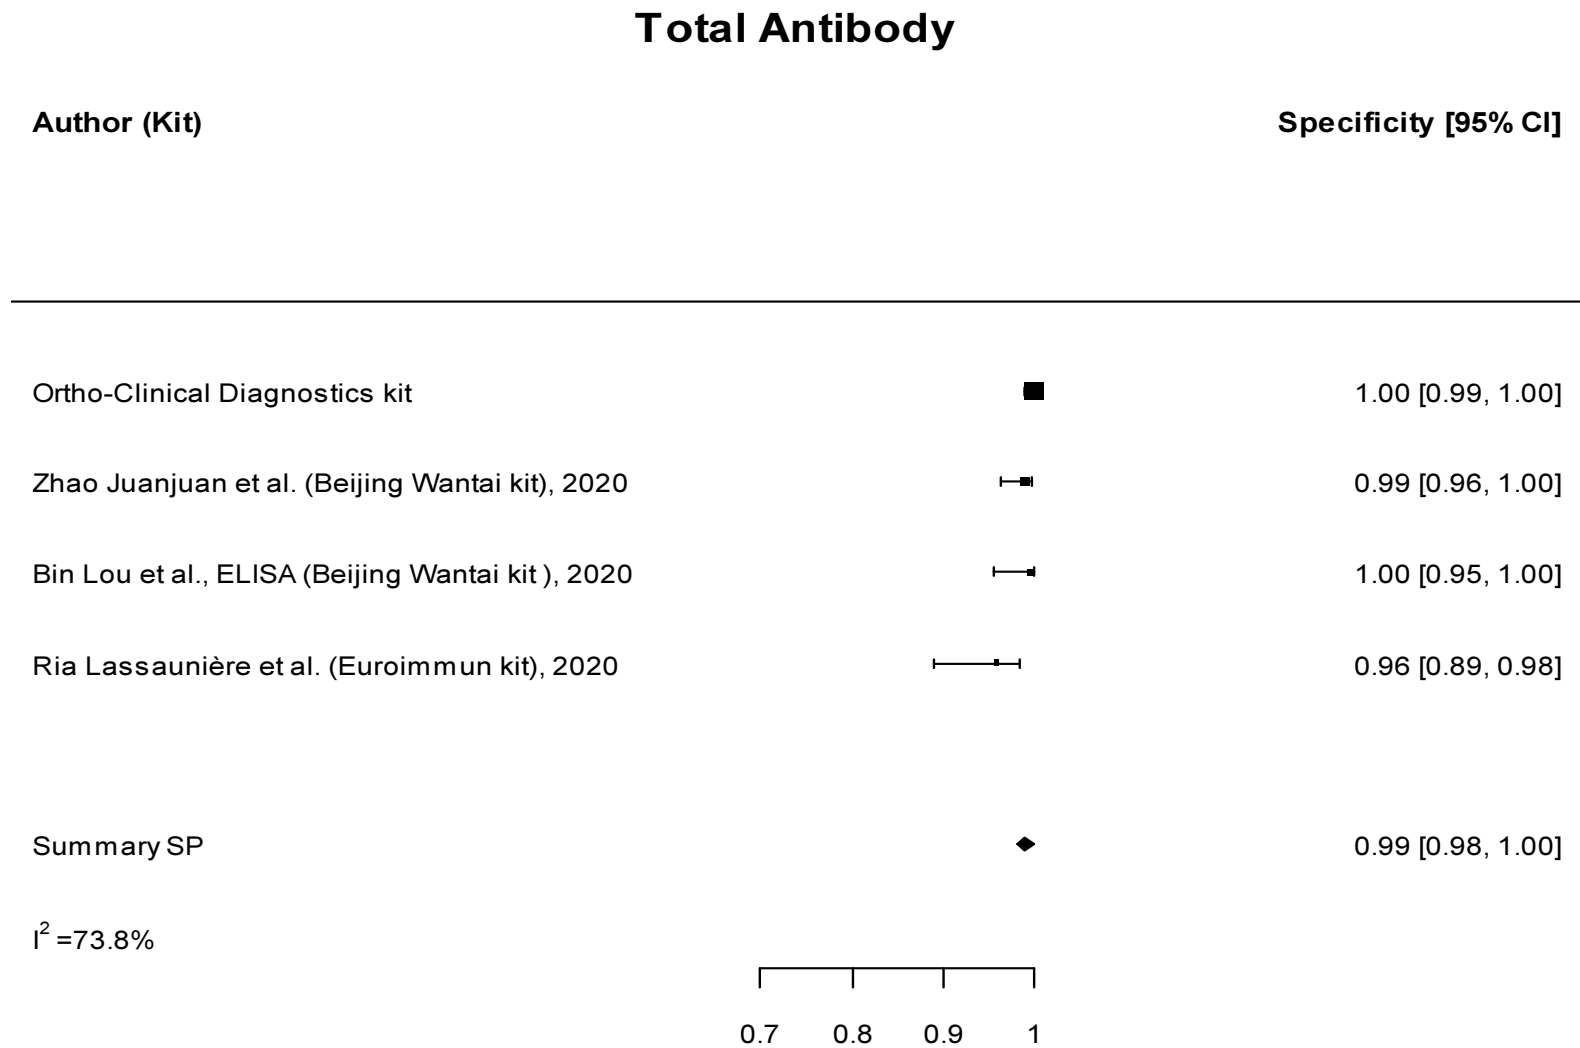

Supplement: Supplementary file [file 2020.05.03.20084160-1.pdf]
